# Supplementary material for: Solid-source vapor growth and optoelectronic properties of arsenic-based layered group-IV monopnictides
Source: Royal Society of Chemistry journal article supplement (doi:10.1039/d2ce00302c), 2022-01-01
Supplement: d2ce00302c1.pdf [file d2ce00302c1.pdf]

## Supporting Information

### **Solid-source vapor growth and optoelectronic properties of arsenic-based layered group-IV monpnictides**

*Syu Kagami*<sup>1</sup>, *Noriyuki Urakami*<sup>1,2, a)</sup>, *Yuichiro Suzuki*<sup>1</sup>, and *Yoshio Hashimoto*<sup>1,2</sup>

<sup>1</sup>Department of Electrical and Computer Engineering, Faculty of Engineering,

Shinshu University, 4-17-1 Wakasato, Nagano 380-8533, Japan

<sup>2</sup>Research Initiative for Supra-Materials,

Shinshu University, 4-17-1 Wakasato, Nagano 380-8533, Japan

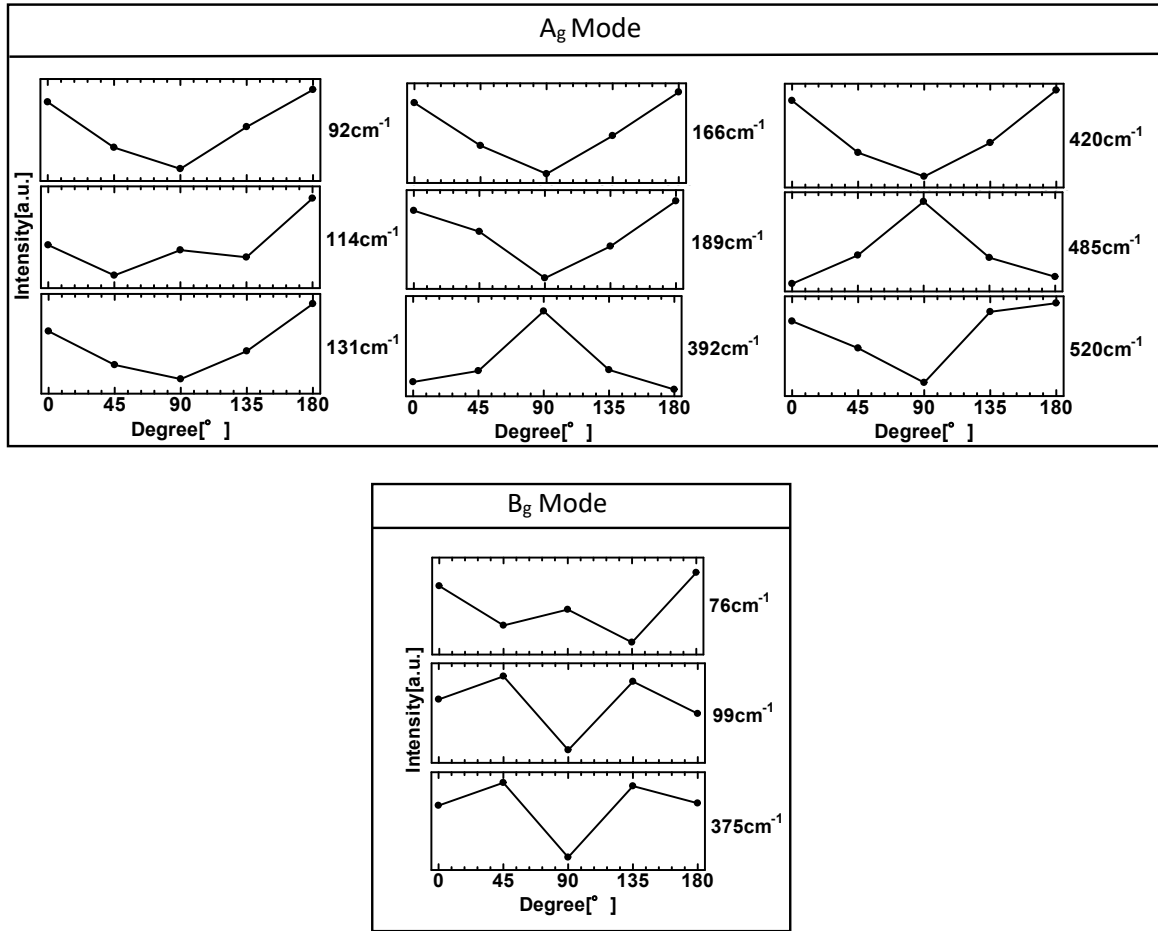

FIG. S1. For SiAs film, angle-dependent Raman intensities for the active vibrations of nine  $A_g$  modes and three  $B_g$  modes.

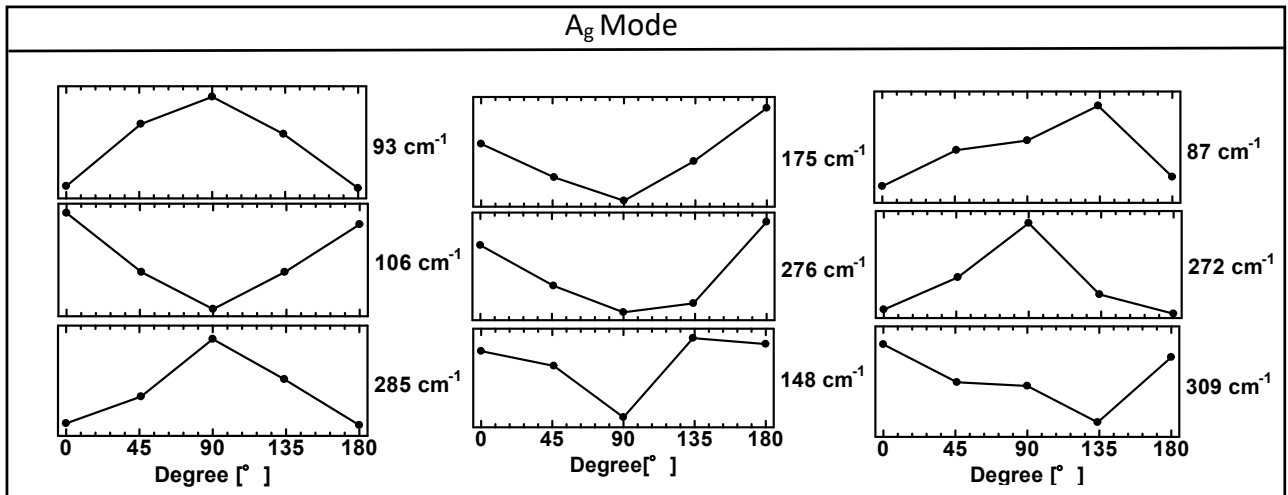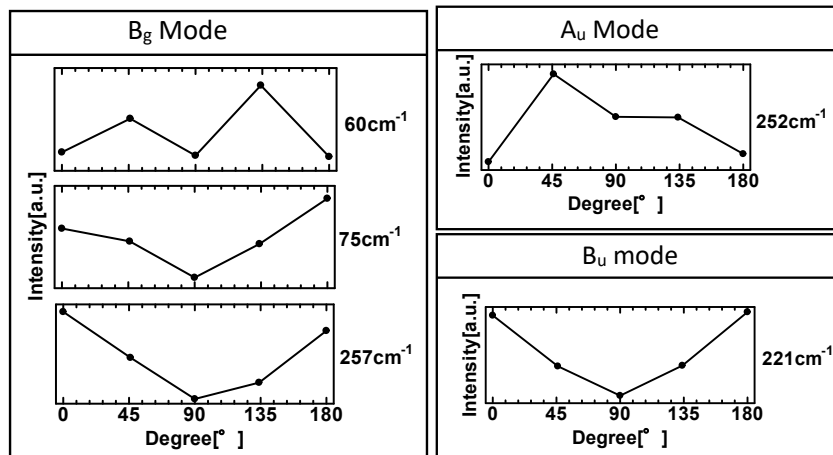

FIG. S2 For SiAs film, angle-dependent Raman intensities for the active vibrations of nine A<sub>g</sub> modes and three B<sub>g</sub> modes.

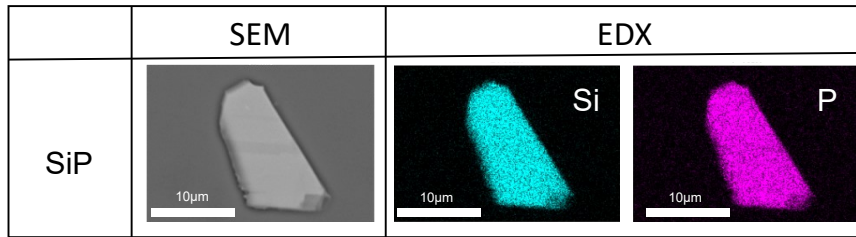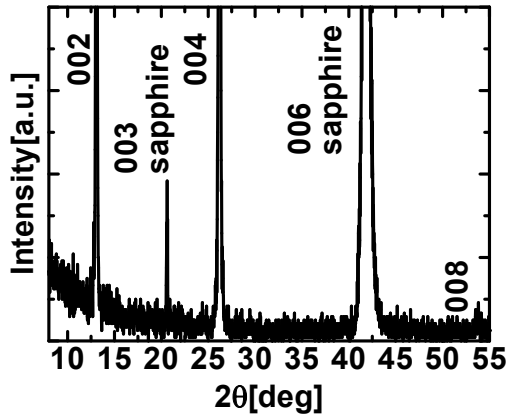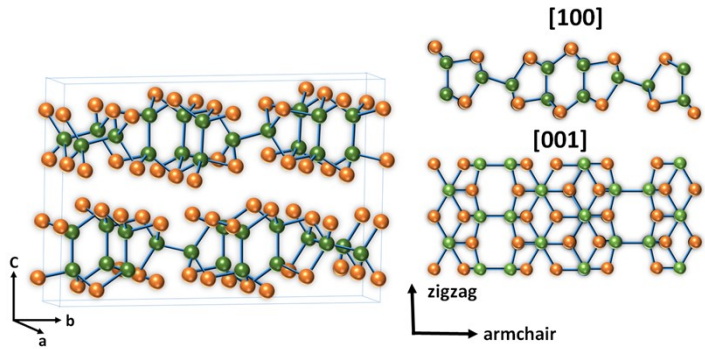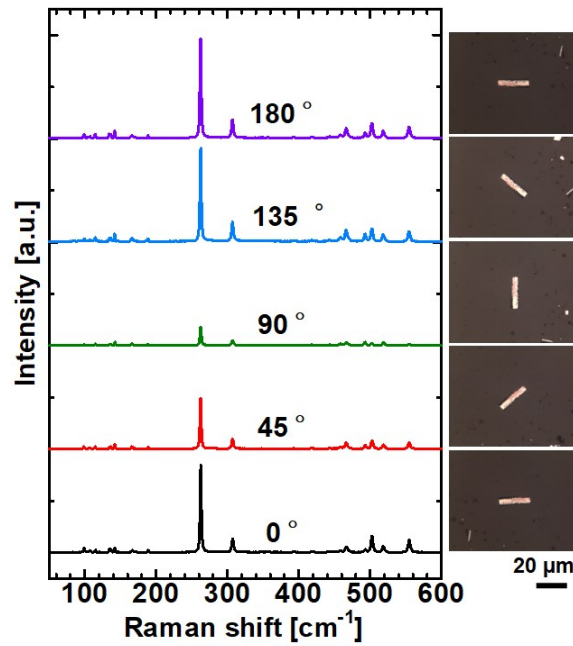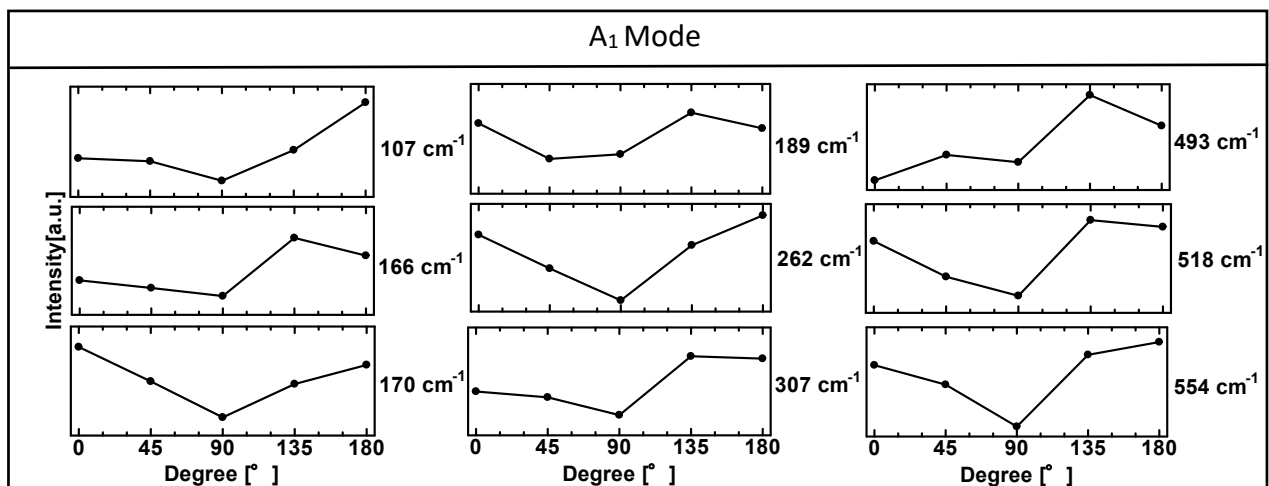

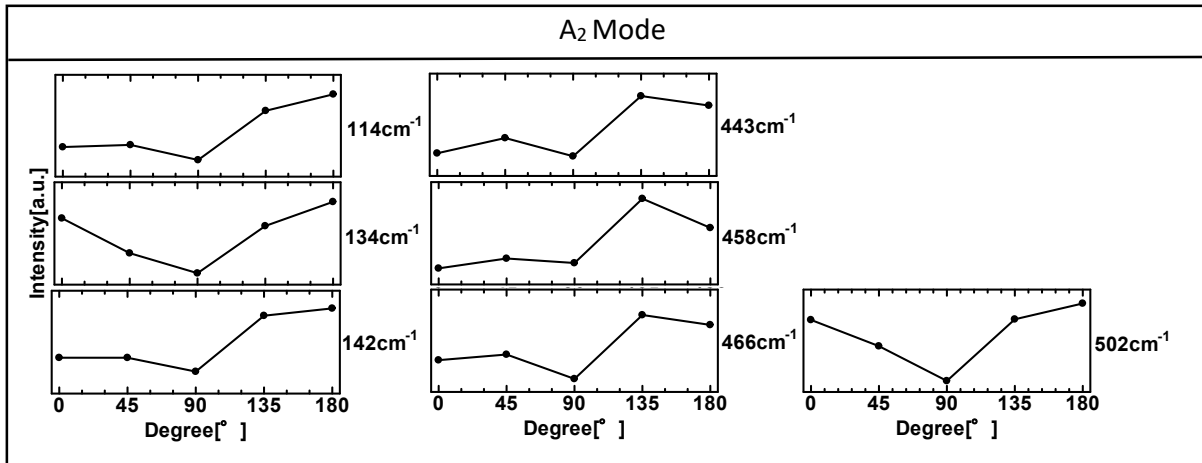

FIG. S3. SEM images with elemental analysis of EDX for SiP. XRD profile of wide-range symmetrical  $\omega/2\theta$  scans for SiP film. Side view and top view for the crystal structure of layered SiP. The green and orange balls represent Si and P atoms, respectively. Angle-resolved Raman spectra of SiP rectangular films. The insets show the digital images of the film angle. Angle-dependent Raman intensities for the active vibrations of  $A_1$  modes and  $A_2$  modes.

SiAs<sub>0.74</sub>P<sub>0.26</sub>

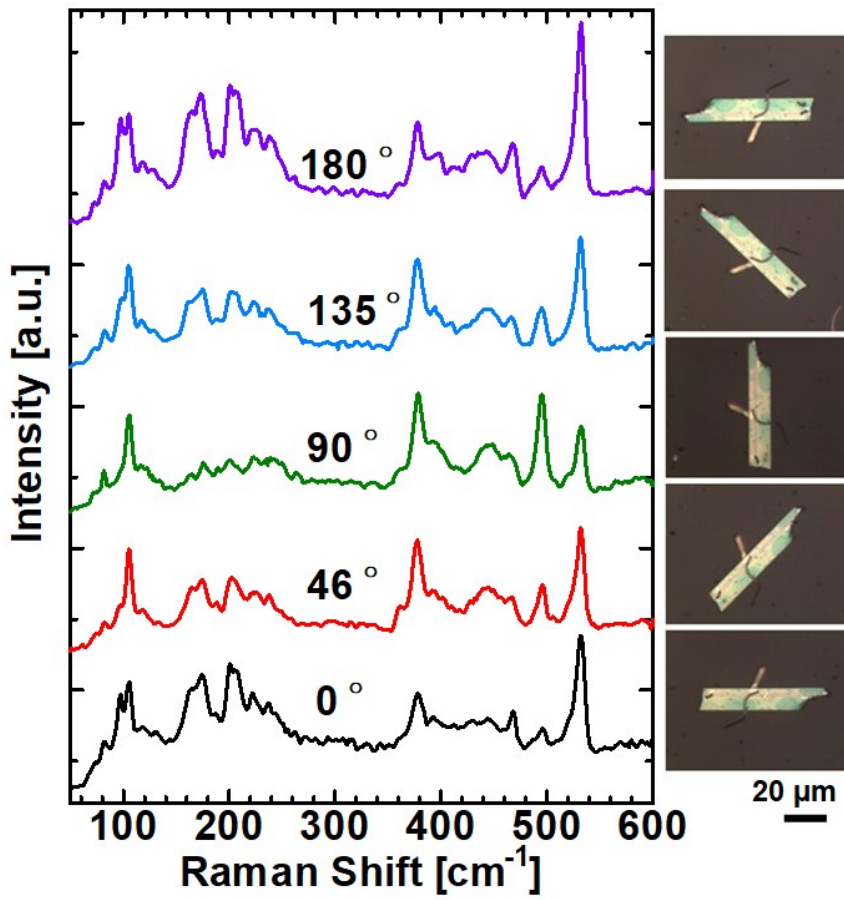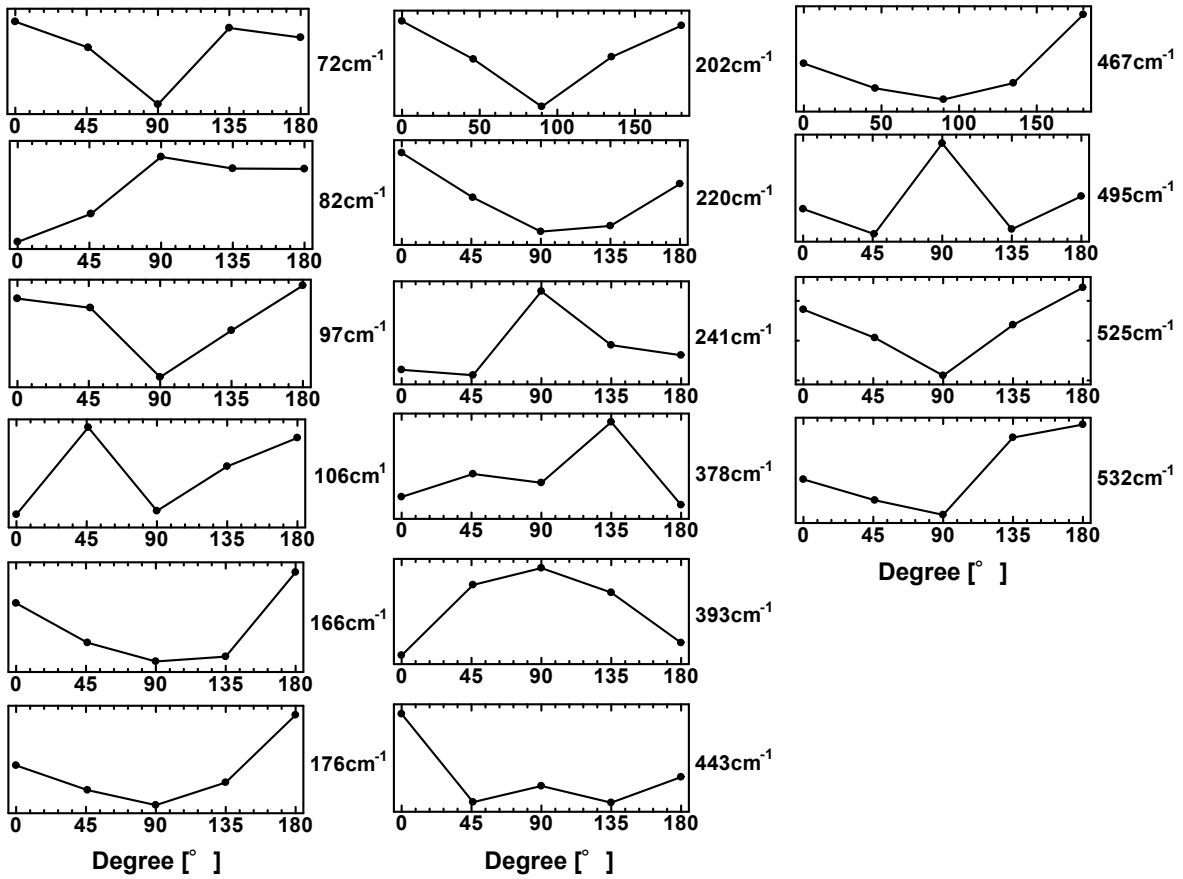

SiAs<sub>0.71</sub>P<sub>0.29</sub>

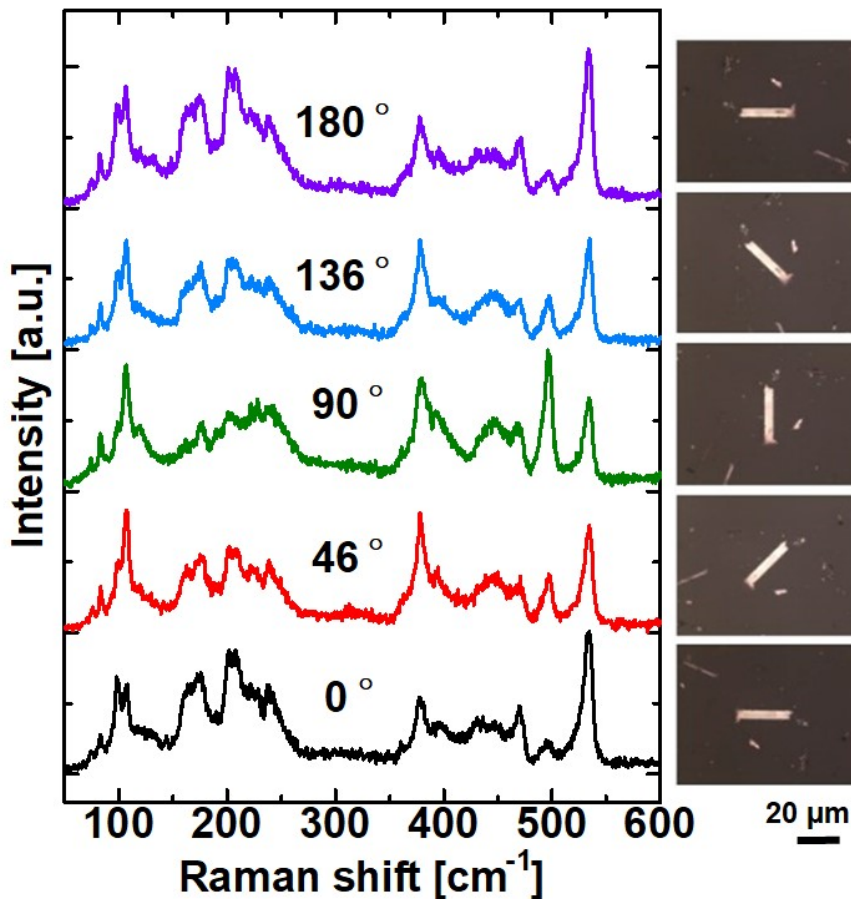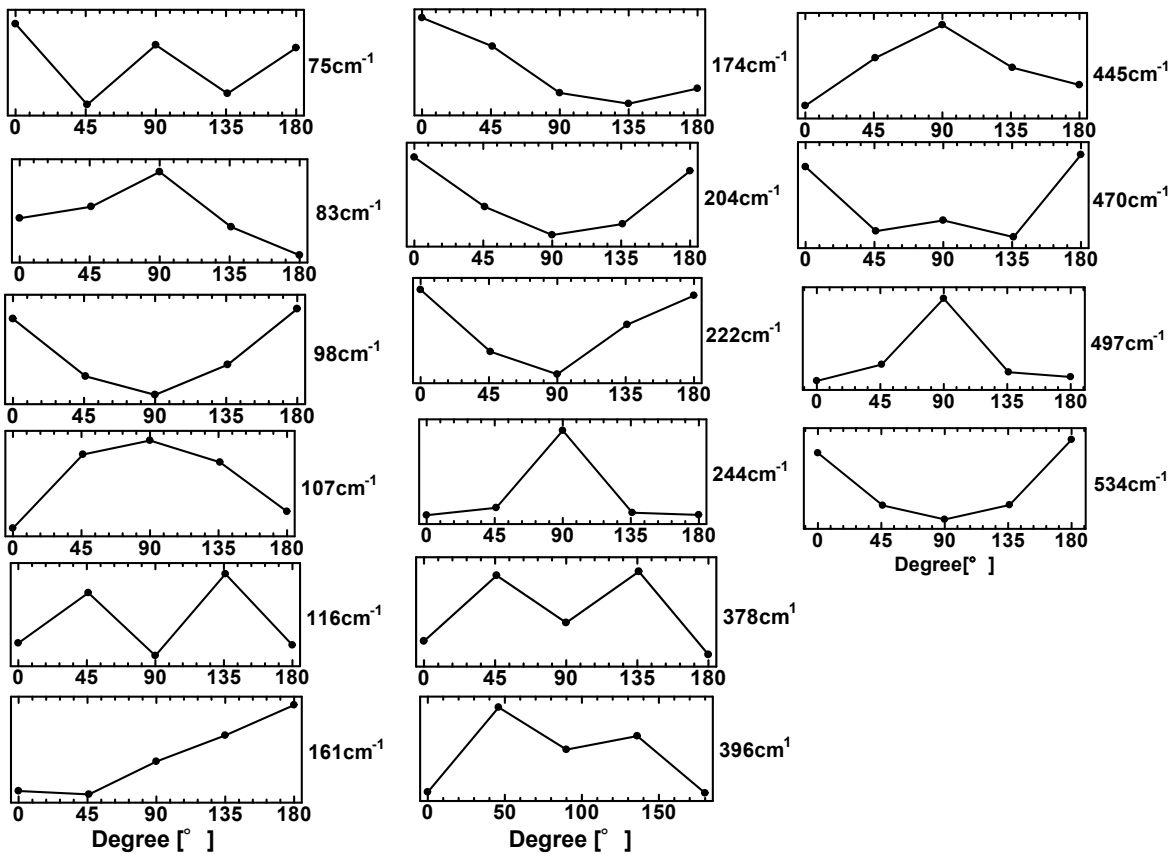

SiAs<sub>0.71</sub>P<sub>0.29</sub>

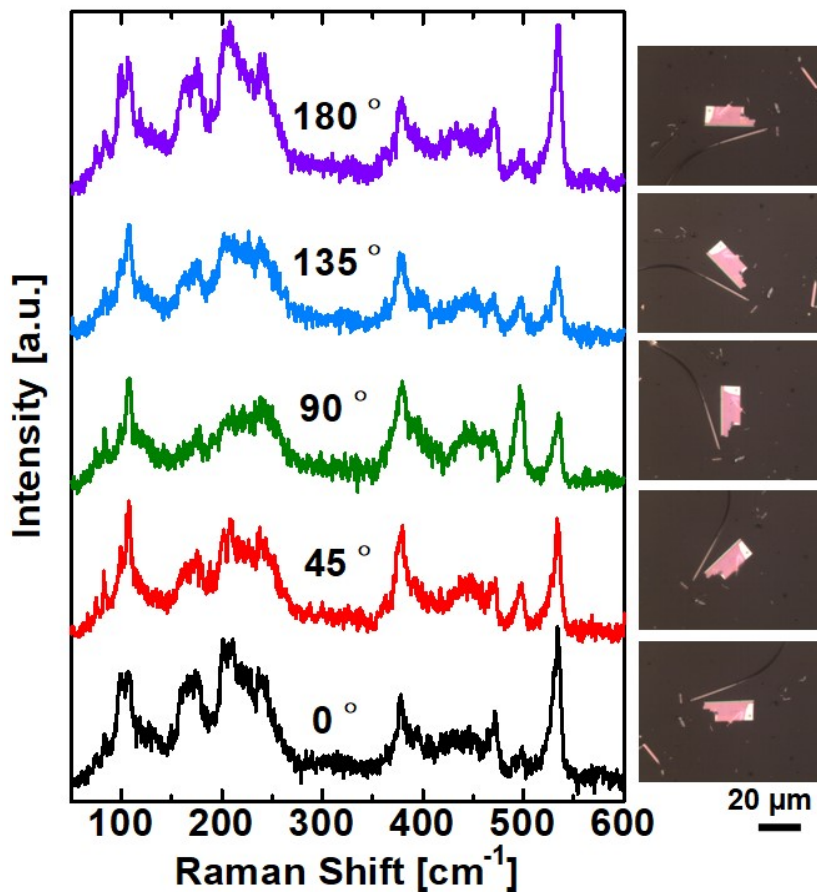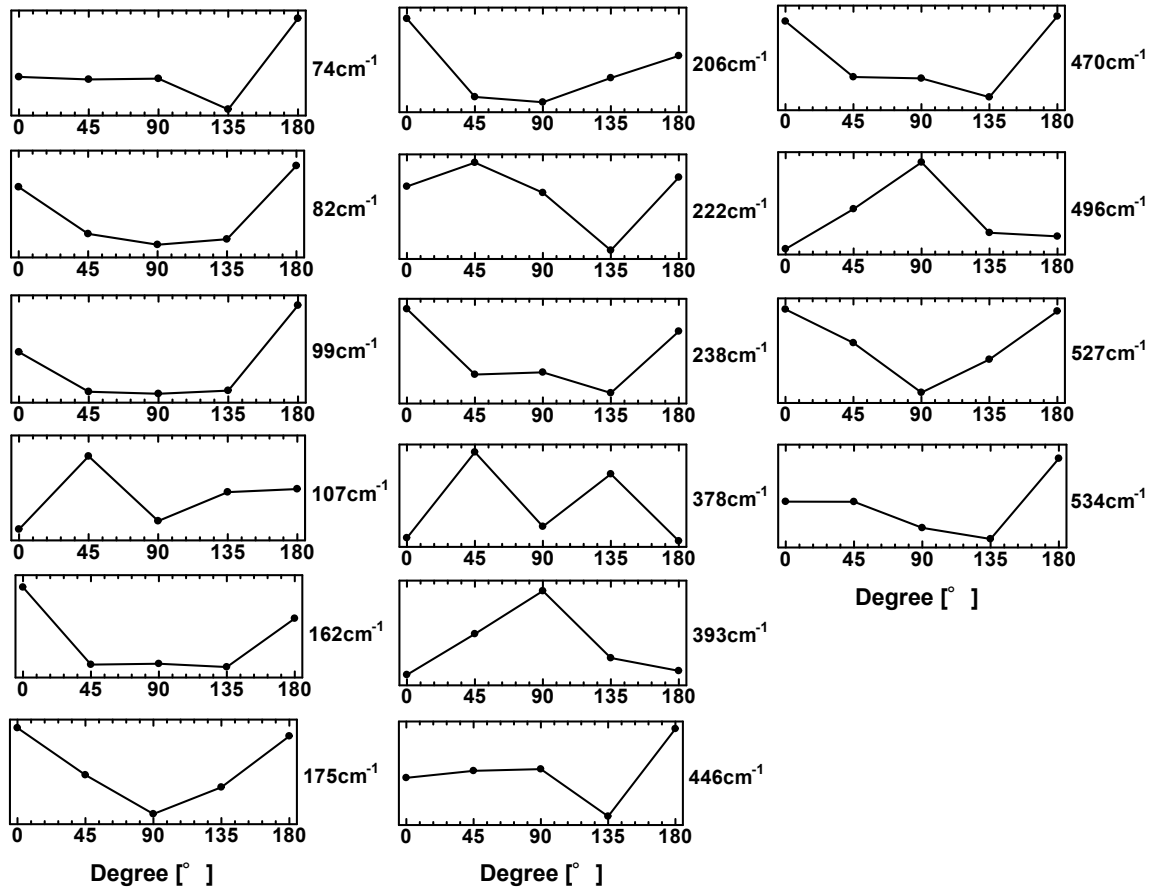



FIG. S4. Angle-resolved Raman spectra of SiAsP rectangular films with the As (P) composition of 0.74 (0.26), 0.71 (0.29) and 0.69 (0.31), respectively. The insets show the digital images of the film angle. Angle-dependent Raman intensities for the active vibrations.

Output characteristics of GeAs FETs

d=173 nm

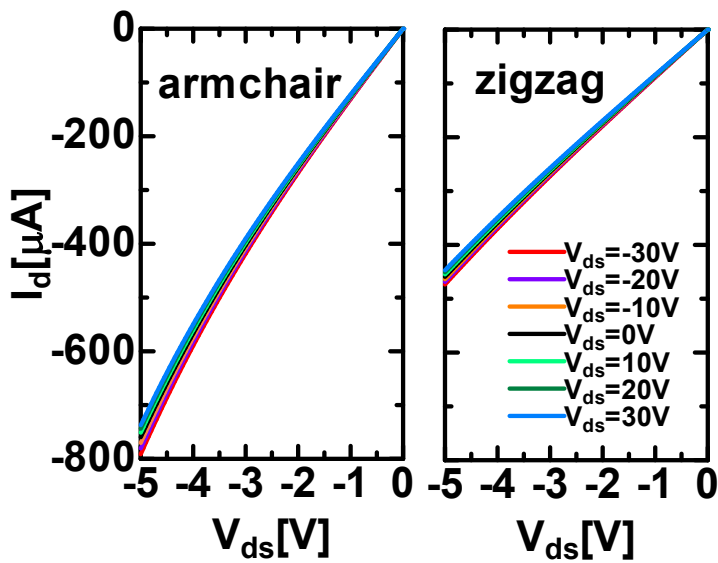

d=81 nm

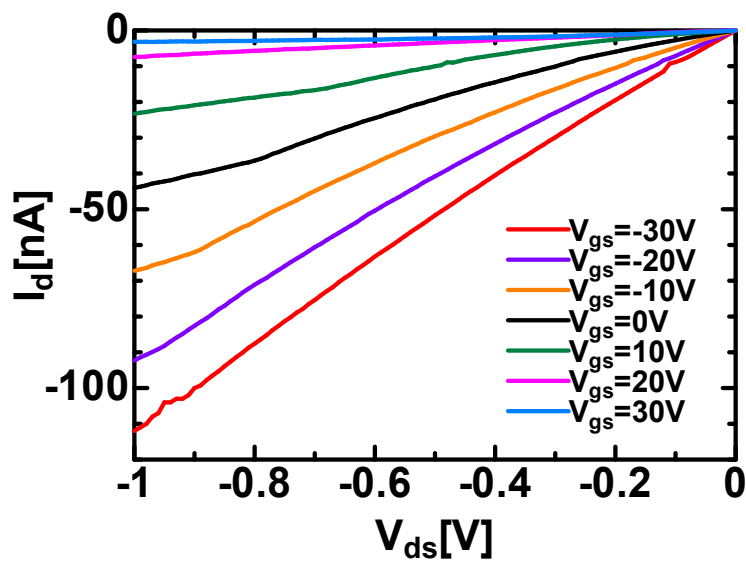

$d=28$  nm

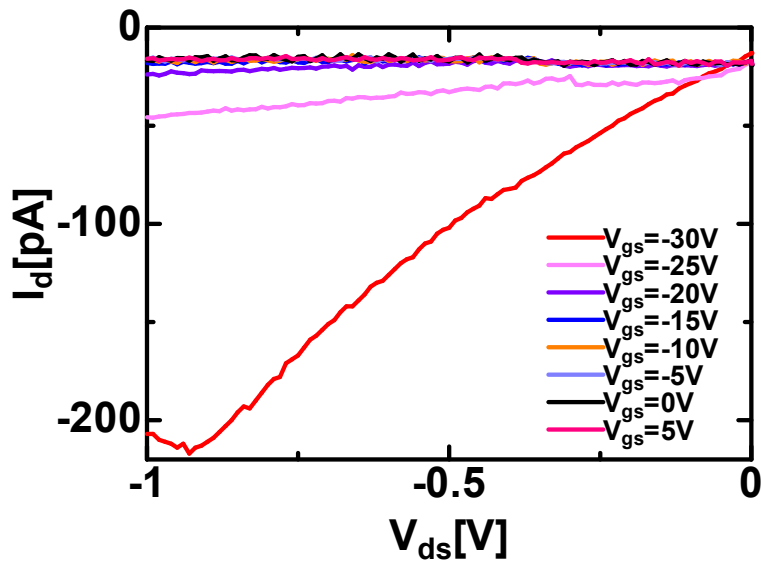

FIG. S5. Output characteristics of GeAs back-gate FETs with various film thickness ( $d = 28, 81$  and  $173$  nm).
